# Supplementary material
Source: Springer Nature journal article supplement (https://www.springermedizin.de/resource/supplementary/12916_2013_957_MOESM4_ESM.pdf/9598906)

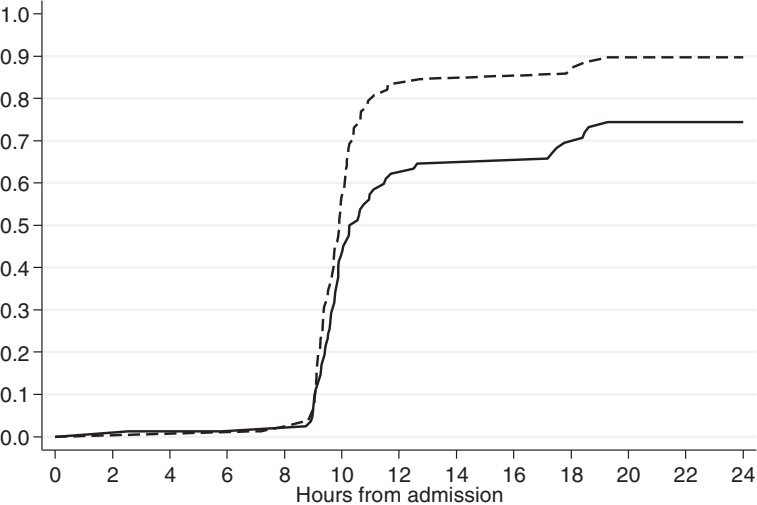

— Arm A: 20mls/kg      - - - - - Arm B: 30mls/kg

Supplement: MOESM4 [file 9598906]
